# Supplementary material
Source: PubMed Central journal article supplement (PMC2822708)
Supplement: NIHMS118689-supplement-SuplFig1.pdf [file NIHMS118689-supplement-SuplFig1.pdf]

**Figure S1** Wang et al

**Synaptophysin staining patterns (dark brown) in dorsolateral prostate lesions and carcinomas** (Hematoxylin counterstain, nuclear, blue)

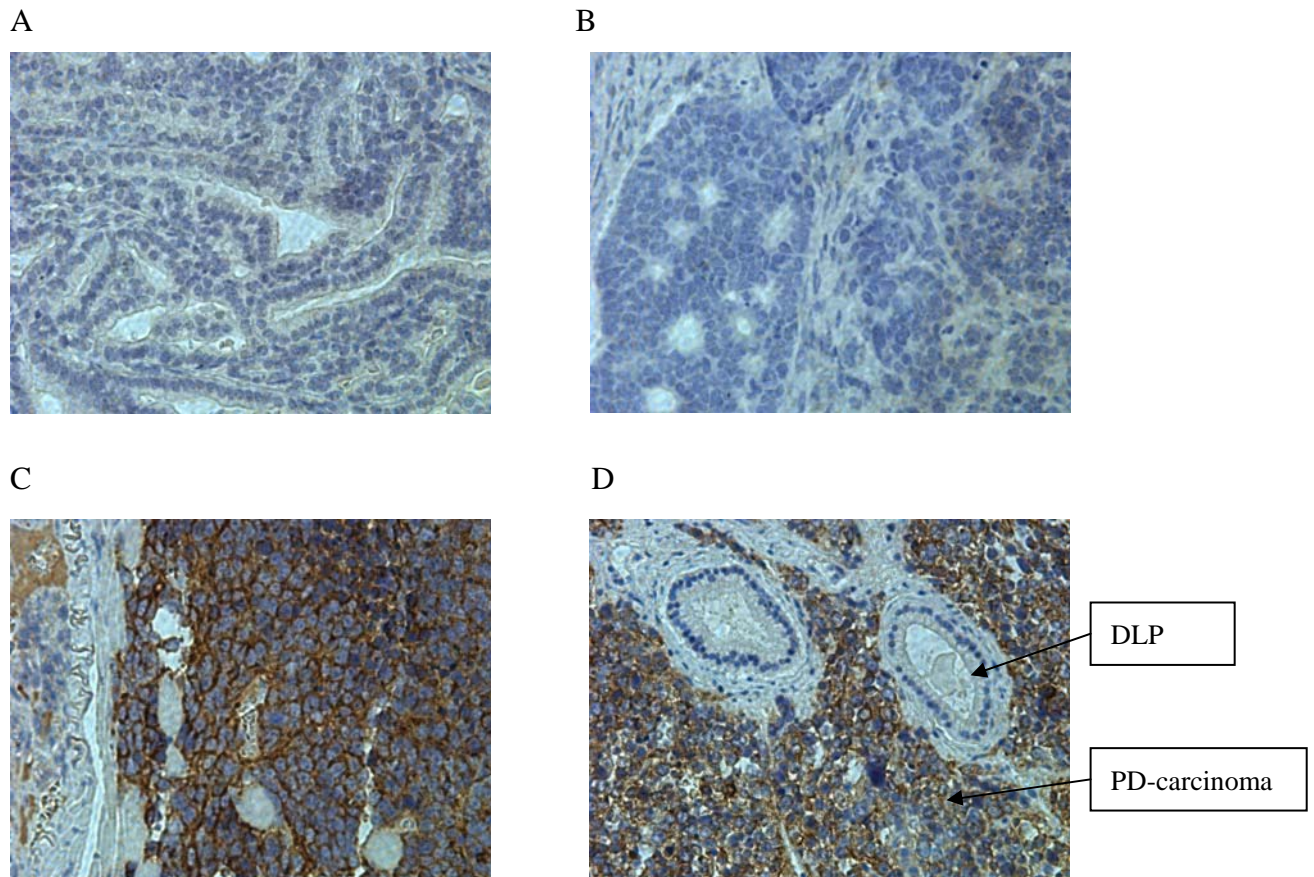

**A.** DL-prostate tissue from mouse No. 546 in 10\_wk MSeA group. Euthanized at 50 weeks of age.  $\times 400$ . Classified as synaptophysin (-).

**B.** DL-prostate tissue in mouse No. 425 in 16\_wk MSeA group. Euthanized at 50 weeks of age.  $\times 400$ . Classified as synaptophysin (-).

**C.** Prostate carcinoma from mouse No. 483 in control group. Euthanized at 26 weeks of age.  $\times 400$ . Classified as synaptophysin (+++).

**D.** Prostate carcinoma from mouse No. 499 in control group. Euthanized at 28 weeks of age.  $\times 200$ . Classification: Carcinoma area, synaptophysin (+++); trapped DLP, synaptophysin (-).
